# Supplementary material
Source: PubMed Central journal article supplement (PMC3149161)

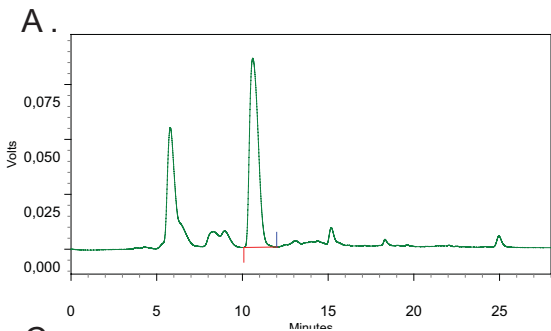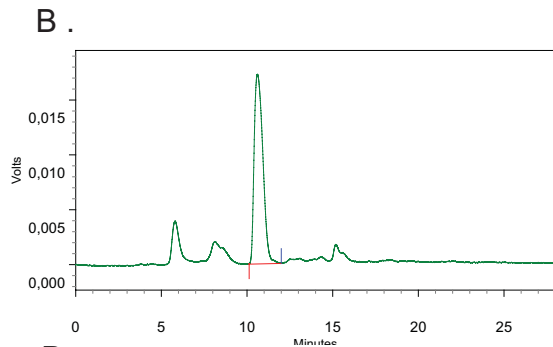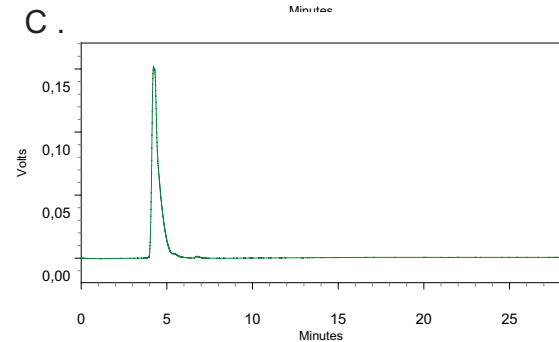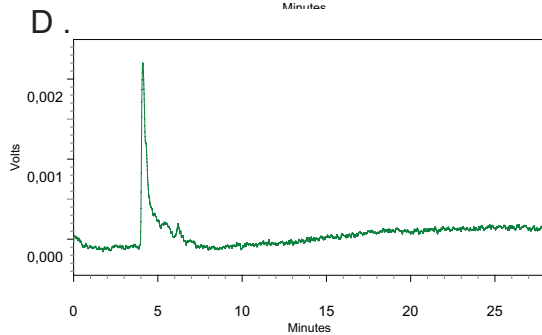

Supplement: mt2011105x2.pdf [file mt2011105x2.pdf]

A.

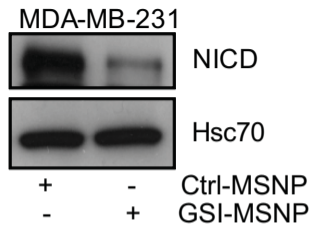

B.

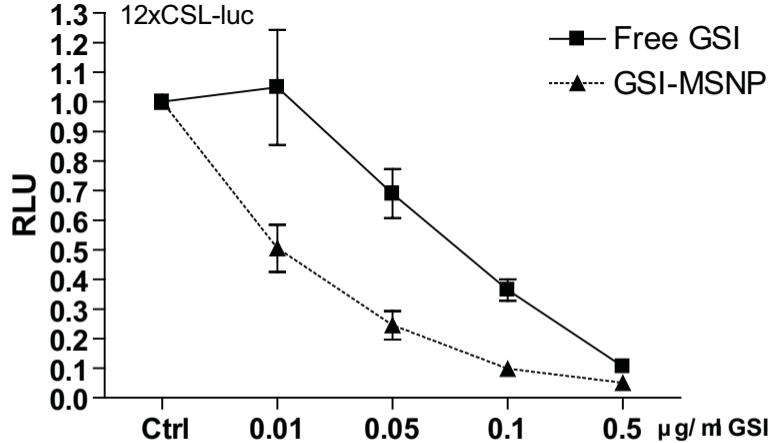

Supplement: mt2011105x5.pdf [file mt2011105x5.pdf]
